# 1 In model-based fMRI significant is less than 2 specific.

3 Erik J Peterson<sup>1</sup> and Carol A Seger<sup>2</sup>

4 <sup>1</sup>Dept of Psychology, Carnegie Mellon University, Pittsburgh, PA

5 <sup>2</sup>Psychology Dept, Colorado State University, Fort Collins, CO

6 Corresponding author:

7 Erik J Peterson<sup>1</sup>

8 Email address: erik.exists@gmail.com

## 9 ABSTRACT

10 By comparing computational model output to BOLD signal changes model-based fMRI has the potential  
11 to offer profound insight into what neural computations occur when. If this potential is to be fully realized,  
12 statistically significant outcomes must imply specific outcomes. That is, we must have a clear idea of  
13 how often a model not present in the BOLD signal but present in the predictor set will reach significance.  
14 We ran Monte Carlo simulations of reinforcement learning to examine this kind of specificity, focusing  
15 in on two aspects. One, to what degree can we tell related but theoretically distinct predictors apart.  
16 About 40% of the time the studied predictors were indistinguishable. Two, how well can we separate  
17 out different parameterizations of the same reinforcement learning terms. Nearly all parameter settings  
18 were indistinguishable. The lack of specificity between models and between parameters suggests a  
19 uncertain relation between significance and specificity. Follow up analyses suggest the temporally slow  
20 and prototyped nature of the haemodynamic response (HRF) can substantially increase correlations,  
21 ranging from -0.16 to 0.73 with an average of 0.27. Though we focused on a single case study, i.e.,  
22 reinforcement learning, specificity concerns are potentially present in any design which does not account  
23 for the slow prototyped nature of the HRF. We suggest more specific conclusions can be reached by  
24 moving from null hypothesis testing approach to a model selection or model comparison framework.

## 25 INTRODUCTION

26 The neural model implicit in many fMRI analyses is a simple switch. Regions of the brain turn on then off.  
27 As an example consider a simple learning experiment with two reward levels. To compare large rewards  
28 (e.g. “Win \$10!”) to small rewards (e.g. “Win \$0.01!”) one typically forms a “impulse”-based GLM  
29 design matrix with two columns. In the first column large rewards get coded as 1, while small rewards are  
30 coded as 0. In the second column small rewards have the opposite code, i.e., “Win \$0.01!” gets coded as 1.  
31 Each impulse-based column is then convolved with a haemodynamic response function (HRF), regressed  
32 onto each voxel’s blood oxygen level dependent (BOLD) time course followed by a statistical contrast of  
33 the two reward conditions, along with a multiple comparison correction. This is the standard statistical  
34 parametric mapping (SPM) routine (Josephs et al., 1997) and it is relatively simple to understand and to  
35 implement. It is also robust to noise and other natural (e.g. regional) HRF shape variation (Henson et al.,  
36 2001; Friston et al., 1998), as thousands of reports empirically demonstrate (Bandettini, 2007).

37 In reality however the neural response and the resulting HRF is not an all or none function. The  
38 HRF changes in size and shape as function of stimulus, e.g. as a function of visual contrast (Boynton  
39 et al., 1996). In fact, stimulus and context dependent changes seem to be the norm. Reward valence and  
40 magnitude (Delgado et al., 2003, 2000), motivation (Delgado et al., 2004), response accuracy (Seger and  
41 Cincotta, 2005), strength of recall (Wais, 2008), degree of regret (Fujiwara et al., 2008), and many other  
42 tasks and conditions all show distinct variations in HRF shape.

43 Model-based fMRI tries to predict such shape variations by replacing impulse codes, where the HRF  
44 shape representing each trial’s response is identical, with varying trial-level estimates. We focus solely  
45 here on estimates derived from computational modeling efforts. These model-based designs are therefore  
46 specific hypotheses about *what* mathematical computation happened *when*. By comparing biologically

47 plausible model implementations, model-based fMRI can be extended to examine *how* a computation  
48 occurred (O’Doherty et al., 2007; Mars et al., 2010). But to meaningfully estimate *what*, *when*, and *how* in  
49 an SPM framework, significant outcomes should imply specific outcomes. That is, there should be strong  
50 relationship between a  $p$  value crossing the significance threshold and the model data closely resembling  
51 the real data.

52 Predicting fMRI BOLD changes with modeling is implicitly a shift from qualitative methods, those  
53 focused on ‘neural signatures’ and broad task-related regional differences, to a quantitative method set  
54 capable of contributing to the crucial and ongoing theoretical discussions of regional neural computation.  
55 But for that shift to be fully realized, when a model-based predictor is significant that significance must  
56 also imply only numerically *very similar* alternative predictors would also be significant. Put another way,  
57 model-based designs must be able to reliably distinguish between theoretically distinct co-variables.

58 Impulse codes work well in practice because they act as a correlational catchall. In reality trial-by-trial  
59 HRFs vary, but most if not all those variations still correlate with the convolved impulse time course  
60 (Baumgartner et al., 2000). This is an extremely useful property for analyses focused on qualitative  
61 neural signatures of *where* activity occurred. But the success of impulse codes suggests a problem for  
62 model-based predictors. While model-based designs try to make specific trial-level magnitude predictions,  
63 the slow prototypical nature of the HRF may lead any given model-based predictor to mistakenly “catch”  
64 theoretically distinct signals, just like impulse designs. To better understand and quantify this potential  
65 specificity problem, we ran several Monte Carlo simulations of model-based fMRI.

66 We chose to focus on reinforcement learning models, making them a case study. Reinforcement  
67 learning measures are one of the most studied model-based predictors. Evidence for a conserved set  
68 of neural reinforcement learning signals comes from electrophysiological studies in multiple species  
69 (Mirenowicz and Schultz, 1994; Hollerman et al., 1998; Roesch et al., 2007), genetic variation studies  
70 (Frank et al., 2007) and causal modalities (Pessiglione et al., 2006; Pizzagalli et al., 2008; Frank and  
71 O’Reilly, 2006), and of course model-based fMRI studies (Glimcher, 2011; Montague et al., 2006;  
72 D’Ardenne et al., 2008; McClure et al., 2003; Seger et al., 2010; Garrison et al., 2013). This strength  
73 of evidence allows us to focus not on the truth of reinforcement learning theory *per se*, but instead on  
74 potential limits of model-based analyses using a well established body of work as our starting place.

## 75 MATERIAL & METHODS

76 We conducted a series of Monte Carlo simulations to examine the specificity of model-based fMRI.  
77 We employed Rescorla-Wagner reinforcement learning models, and other reward-related regressors,  
78 as a case study. First we will describe the construction of the simulated behavioral data. Second is  
79 reinforcement learning model construction and parameter fitting. Third we describe the mechanics of the  
80 fMRI simulations.

81 In the course of this and other work we developed a new fMRI simulation package for Python  
82 dubbed “modelmodel” (<http://www.robotpuggle.com/code/>). This library is unique both in its focus on  
83 model-based simulations and its ability to seamlessly intermix simulations with ROI analyses of real  
84 fMRI data. All other simulation code is available for download and (re)use. Each simulation consisted of  
85 1000 iterations. Visualization and other post-simulation analysis was completed in R language.

### 86 Simulating behavioral data

87 Behavioral data consisted of  $N = 60$  simulated trials over a single condition  $c$  intermixed with 30 “baseline”  
88 jitter periods sampled from the uniform distribution,  $U(1, 6)$ . Jitter periods are short random pauses  
89 that allow for rapid event-related fMRI designs, i.e. designs whose trials are shorter than the  $\sim 30$  seconds  
90 it takes for the BOLD response to return to its baseline level.

91 We simulated two types of behavior - learning and guessing. During learning, behavior was modeled  
92 as guessing (i.e.  $p \sim U(0, 1)$ ) until some trial  $k$  after which learning began. Learning was simulated by  
93 sequential sampling of the cumulative normal distribution  $P_r \sim CDF(\mathcal{N}(\mu, \sigma))$ . The mean ( $\mu$ ) was itself  
94 sampled from  $\mathcal{N}(3, 0.3)$  with the standard deviation ( $\sigma$ ) fixed at 1. The transition point  $k$  shifted the  
95 onset of learning behavior, while  $\mu$  modulated the slope of the learning curve. Parameter  $k$  was drawn  
96 from  $U(0, 59)$ , matching the (jitter-excluded) trial index ( $i = \{0, 1, 2, \dots, N - 1\}$ ). Sample guess was drawn  
97 only from the uniform distribution (i.e.  $P_r \sim U(0, 1)$ ). Accuracy data for trial  $A(i)$  was generated for  
98 both learn and guess using  $P_r$  and the binomial distribution (e.g.,  $A_{learn}(i) \sim B(1, p_{learn}(i))$ ), Figure 1A  
99 and B). The parameters  $k$  and  $\mu$  were adjusted until  $P_r$  was broadly similar to learning curves we’ve

100 observed in previous empirical studies of stimulus-response and reinforcement learning (Lopez-Paniagua  
101 and Seger, 2011; Seger et al., 2010; Seger and Cincotta, 2005) (Figure 1A). guess time courses had no  
102 notable dynamics; accuracy and  $P_r$  fluctuated around 0.5 (Figure 1B). Trial counts ranging from 20 to 100  
103 ( $N$ ) were initially examined, but had no substantive impact on our results.

#### 104 **Reinforcement learning models**

105 Two approaches for generating reinforcement learning data were employed. The first, the *confusion*  
106 approach, assessed how likely different performance, reward probability, and reinforcement learning  
107 regressors might be confused in a GLM context. In the *confusion* analysis the learning rate  $\alpha$  and response  
108 volatility parameter  $\beta$  were fit by maximum log-likelihood, as is typical in the behavioral literature  
109 (Glimcher, 2011; Montague et al., 2006; D’Ardenne et al., 2008; McClure et al., 2003; Seger et al., 2010).

110 For the *confusion* data, model parameters were exhaustively searched, in 0.01 increments. The learning  
111 rate  $\alpha$  spanned (0, 0.01, 0.02,  $\dots$ , 1). The choice parameter  $\beta$  spanned (0, 0.01, 0.02,  $\dots$ , 5). Log-likelihood  
112 estimates were calculated based on a softmax transform of trial-wise values  $V_t(c)$  into the log of choice  
113 probabilities followed by a summation (Eq 3). The best parameter set was the one that maximized  
114 log-likelihood ( $\max_i(\mathcal{L})$ ). For example time courses see Figure 1A and B.

115 In the second approach,  $\alpha$  values were selected *a priori*. This *separation* design assessed to what  
116 degree different parameterizations of the same reinforcement learning measures can be reliably separated  
117 in a model-based design. In the *separation* set  $\alpha$  was iteratively set to 0.1, 0.3, 0.5, 0.7, 0.9 (see Figure 1B  
118 and C). As there was no search, no softmax transform was required and no  $\beta$  settings were considered.  
119 Only guessing behavioral models were employed for the separation analyses.

120 In both *confusion* and *separation* we examined two classic reinforcement learning measures. First was  
121 *value*, denoted  $V_t(c)$ , and calculated as in Eq 2. *Value* is an estimate of total future rewards, a measure  
122 closely tied to the expected value (Sutton and Barto, 1998). Second was the reward prediction error  
123 (denoted as  $\delta$  or *RPE*, see Eq 1). *RPEs* result from the comparison of the current estimate of value to the  
124 received reward (Eq 1). The learning rate ( $\alpha$ ) controls how much the current *value* update is influenced  
125 by past updates. With lower  $\alpha$  settings current learning is strongly affected by *past values*, leading to a  
126 slower progression. Large  $\alpha$  values have the opposite effect; learning is fast but volatile and history has  
127 little effect (compare the leftmost and rightmost columns in Figure 1C). The salience parameter (denoted  
128 as  $\gamma$  here) was set to 1 for all analyses.

$$\delta \leftarrow r(t) - V_t(c) \quad (1)$$

$$V_{t+1}(c) \leftarrow V_t(c) + \alpha\gamma\delta \quad (2)$$

$$\mathcal{L} = \sum_{t \in T} \log \left( \frac{e^{\beta V_t(c_0)}}{\sum_{c \in C} e^{\beta V_t(c_0)} + e^{\beta Q_t(c_1)} + \dots} \right). \quad (3)$$

#### 129 **fMRI simulations**

130 fMRI data was constructed from behavioral and reinforcement learning time-series. Each series was  
131 convolved with the “canonical SPM” HRF. The canonical HRF is an impulse response characterized by  
132 two gamma functions, one for the peak and one for the post-peak undershoot. It is parameterized by a  
133 peak delay of 6 s, an undershoot of 16 s. The peak/undershoot amplitude ratio is 6 (Penny et al., 2006).

134 BOLD data was simulated by combining these HRF-convolved series with white noise  $\sim \mathcal{N}(\mu, \sigma)$ .  
135 Several other noise sources were examined, including  $1/f$ , autocorrelated white noise (AR(1)), white  
136 noise plus respiration confounds, and white-noise plus low frequency drifts. Each of these alternate  
137 noise sources reduced specificity more than white noise. In some cases (e.g. the low frequency drift  
138 and respiration models) the reduction was large,  $>25\%$ . The *qualitative* pattern of results was, however,  
139 unaltered by noise. We went with the conservative choice of white noise. If specificity was low with white  
140 noise, the problem would only worsen with more realistic noise choices.

141 For the *confusion* analyses the model-based predictors were *value* and *RPE*. The behavioral predictors  
142 were *Pr* and *accuracy*. We also included a randomly fluctuating predictor ( $\sim U(0, 1)$ ) as a control  
143 condition. It was denoted as *random*. Each predictor took a turn as the “BOLD signal” (above) onto which

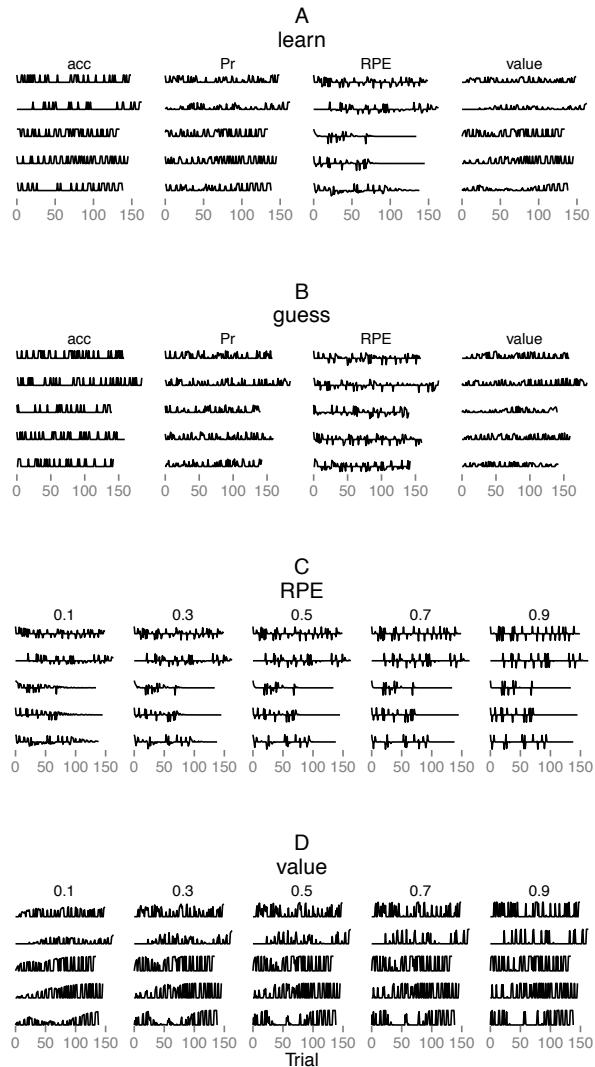

**Figure 1.** Randomly selected examples of the four simulated reinforcement learning measures - accuracy (acc), reward probability  $P_r$ , an estimate of expected *value*, and reward prediction error *RPE*. **A** and **B** represent time courses for the *confusion* analysis and were determined, in part, based on the maximum likelihood fitting procedure described in the text. **A** is examples of behavioral learning. **B** shows simulated guessing behavior. Note how the *value* graphs show a general rise across trials as subjects learn, whereas *RPE* decreases in variability across learning as fewer errors are made. The bottom two panels are from the *separation* analysis and demonstrate how *RPE* (**C**) and *value* (**D**) change with learning rate ( $\alpha$ ). Each column in the bottom two panels matches a value of  $\alpha$  ranging from 0.1 to 0.9 in 0.2 steps. In **C** and **D** all example data is from the learn behavioral models.

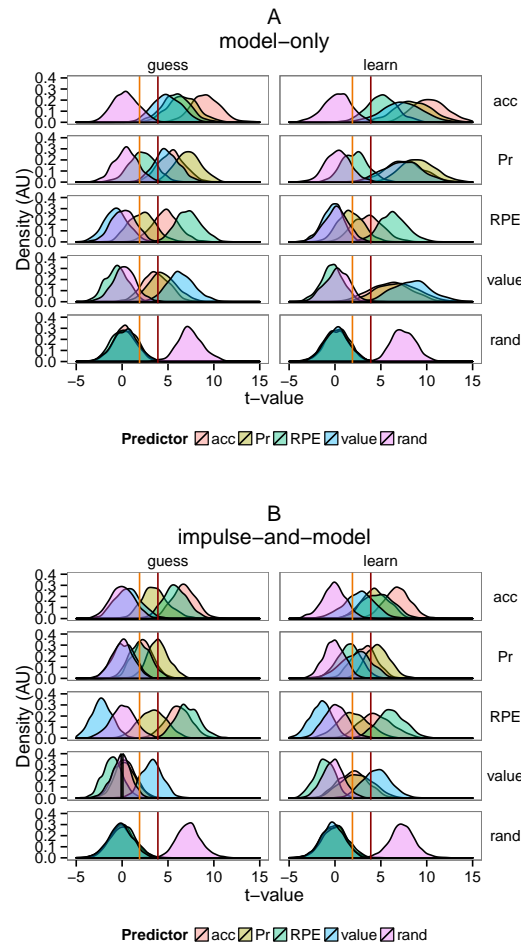

**Figure 2.** Distribution of  $t$ -values for all *confusion* analyses, which examined the specificity of model-based fMRI between theoretically distinct trial-level predictors shown in Figure 1A. The five predictors were *accuracy* (red),  $P_r$  (yellow), *RPE* (green), *value* (blue), and *random* (violet, ‘rand’). In the left column is guessing behavior, on the right is the learning. Each row represents a different true BOLD signal (see labels on the right). That is, each predictor (with noise added) was used to form the simulated BOLD signal that the predictors were fit to. Note that, as expected, there was good correspondence between the actual underlying BOLD signal and the best fitting predictor. Note also the high degree of overlap between the actual predictor and the other predictors across all conditions except *random*. The red and orange vertical lines represent two common statistical cutoffs,  $p < 0.0001$  and  $p < 0.05$  respectively. For example, in the top row, where accuracy (‘acc’) is the true signal, a large proportion of the distribution for all other predictors other than *random* falls to the right of the  $p$  value thresholds, indicating a lack of specificity and a high degree of confusion. The top panel (A) represents the model-only approach to GLM regression, while the bottom (B) represents the impulse-and-model approach, a commonly recommended procedure for model-based analyses.

144 all predictors were separately regressed. This round robin procedure allowed us to assess the degree to  
145 which each predictor covaried with the others, or was specific. For example, if the first iteration's BOLD  
146 signal was to be *RPE*, the raw RPE trace was convolved with the HRF and white noise (as separate steps).  
147 Each of the other confusion predictors (i.e. *value*, *Pr accuracy*, *impulse* and *random*) would then be HRF  
148 convolved (without noise) and regressed onto the newly anointed RPE-BOLD signal, in turn. That is,  
149 each confusion predictor was regressed separately and independently. The regression constants,  $t$  and  $p$   
150 for each independent iteration were harvested and retained for later analysis. That is each round robin  
151 yielded 5 sets of regression statistics. It is these statistics that are presented in the results. On the next step  
152 of the round robin, for example, Pr could be anointed. The raw Pr would then undergo white noise and  
153 HRF convolution, and separate regressions by the remaining five predictors (i.e. *value*, *RPE accuracy*,  
154 *impulse* and *random*). And so on, until all 6 predictors were once anointed as BOLD signals. Once all 6  
155 had their turn that iteration of the simulations terminated, leading to either new random generation of  
156 behavioral data or program termination.

157 For the *separation* analysis we focused on the comparing *value*, *RPE* over a range of  $\alpha$  values.  
158 Regressions were similarly round robin, but within predictor, e.g. every *RPE* at every  $\alpha$  took a turn as  
159 the BOLD signal, where it was predicted by every other *RPE*, itself included. A *random* condition was  
160 included as well.

161 We took two approaches to the design matrix. In the first, model-based predictors were regressed  
162 directly onto the BOLD signal, akin to a simple correlation. This model-only approach serves as a  
163 worst-case specificity scenario. The second impulse-and-model design improves specificity by including  
164 both an impulse and a model-based regressor, but orthogonalizing the former with respect to the latter.

165 Computational model and impulse regressors are often correlated or collinear, violating the indepen-  
166 dence assumptions implicit in the Ordinary Least Squares (OLS) algorithm we used in our SPM procedure.  
167 To rectify this we orthogonalized the model-based predictor with respect to the impulse predictor. The  
168 orthogonalization procedure is regression-based, wherein the computational model's predictor is regressed  
169 onto the impulse, returning the residuals. These residuals therefore contain only variance present in the  
170 computational model. So when this residualized model-based predictor and the impulse are combined  
171 into a single design matrix (thus creating our "impulse-and-model" matrix) the impulse regressor captures  
172 binomial (i.e. on/off) activity while the other, model-based, regressor picks the computational models  
173 contribution. In our results using both impulse and model predictors we present  $t$ -values from the model  
174 predictor, consistent with the model-only results.

175 This impulse-and-model is an often recommended strategy for doing model-based fMRI. But the  
176 model-only design has significant expositional value. First, it is the simplest and most direct route to  
177 carrying out a model-based design. This makes it worth examining on its own. Second, its presence serves  
178 to highlight the degree of the specificity problem before any corrective action is taken.

179 In some reward learning analyses stimulus/response and outcome are separated by a short pause,  
180 typically 1-4 seconds. While we did not include such a break in the simulated behavioral data we did  
181 examine the effect of shifting value and RPE predictors by up to 3 TRs. A delay between the two  
182 regressors did increase specificity. It did not do so in a way that qualitatively changed our results. We'd  
183 expect even longer delays to have more pronounced effects, but such delays are not common in current  
184 designs and would represent a significant experimental temporal opportunity cost when other specificity  
185 increasing methods are available (see *Discussion*).

186 If a researcher is concerned with covariates effecting the specificity of their result, it would be typical  
187 to include such regressors in the analysis. We don't do so here because the specificity we're concerned  
188 with isn't the known co-variate, but instead the many unknown or unconsidered (to the researcher)  
189 theoretical alternatives which happen to be weakly collinear with a known (and included in the model)  
190 covariate. In such a situation a researcher might mistakenly conclude in favor of the known covariate.  
191 This is akin to the inference, upon achieving significance with, say, the "value" covariate, that it is the  
192 "correct" model of activity in a given voxel, and so implicitly other models are wrong.

### 193 **Defining specificity**

194 As noted in the introduction, the success of impulse-based designs suggests imperfect specificity. So at  
195 what point should non-specificity become a concern? We could find no prior work assessing fMRI model  
196 specificity. So we pragmatically chose two conservative cut-offs – the 50% and 25% marks. If 50% of  
197 the simulations were significant for "false" predictors (i.e. significant when the BOLD signal was not

198 the same as the predictor) we believe these should be considered “indistinguishable”. If five times the  
199 standard false positive rate (5%) were falsely significant (i.e., 25%) we posit this should be considered  
200 “non-specific”.

## 201 RESULTS

202 The specificity of model-based fMRI was examined in two analyses. *Confusion* analyses examined  
203 the specificity between theoretically distinct (covariate) regressors. The second, *separation*, analyses  
204 examined specificity as function of model parameter selection.

### 205 Confusion

206 Tabulating over all 40 *confusion* analyses, including both modes of simulated learning, the five trial-level  
207 predictors were indistinguishable 48% of time and non-specific 52% of time, when using the model-only  
208 type design matrix and the  $p < 0.05$  cutoff (see *Methods* for details). For the impulse-and-model design  
209 overall specificity did improve approximately 15% compared to the model-only design; 34% of the time  
210 predictors were indistinguishable and 42% they were non-specific ( $p < 0.05$  cutoff).

211 Overall the impulse-and-model approach does increase specificity. This increase comes at the cost of  
212 power. In the model-only design when BOLD signal and predictor match percent significant was  $\sim 100\%$ .  
213 But in impulse-and-model this self-recovery percentage drops to between 15 and 100%, averaging  
214  $\sim 80\%$  (compare **A** to **B**, Figures 2 and 3). This reduction in power is despite a uniform decrease in  
215 variance between model-only and impulse-and-model distributions (average difference was  $1.01SD$ ,  
216  $SD_{impulse-and-model} = 2.97$ ,  $SD_{model-only} = 3.69$ ) (compare **A** and **B** in Figure 2).

217 Discussing the model-only results in detail, BOLD models based on *accuracy* and  $P_r$  were indistin-  
218 guishable for all other predictors, all that is but the *random* predictor (Figures 2**A** and 3**A**). The *random*  
219 was and should have been specific in all cases because it contains no trial-level information, sampled as it  
220 was from  $U(0, 1)$ , the uniform distribution. It worth noting however that the *random* BOLD model was  
221 significant 15-20% of time (see *Discussion*). The *RPE* BOLD model was indistinguishable from  $P_r$  and  
222 *accuracy* under guessing behavior and indistinguishable and non-specific during learning while *value* was  
223 specific (compare left and right columns, Figures 2**A** and 3**A**). When instead *value* acted as the BOLD  
224 signal, both  $P_r$  and *accuracy* were indistinguishable for both behavior types (Figures 2**A** and 3**A**). Overall,  
225 the behavioral model had little effect on specificity (compare columns in Figures 3, see exceptions above).

226 In the impulse-and-model design, like the model-only design, *accuracy* and  $P_r$  BOLD models were  
227 non-specific or indistinguishable to all other predictors (Figures 3**B**). *RPE* was indistinguishable from both  
228 *accuracy* and  $P_r$ . Finally, under the impulse-and-model design only *value* displayed consistent specificity  
229 under the guessing behavior (right column, Figure 3**B**). Under learning behavior though specificity was  
230 identical to the model-only condition;  $P_r$  and *accuracy* were indistinguishable (left column, Figures 2**B**  
231 and 3**B**).

### 232 Separation

233 The *separation* analysis examined specificity between reinforcement learning model learning rate ( $\alpha$ )  
234 parameterizations. No parameter setting was specific. Only the extreme settings of *RPE* were merely  
235 non-specific (column 0.1 compared to 0.9, and its complement, Figure 4**A** and **B**). All other *RPE* and  
236 *value* predictors were indistinguishable (Figure 4**A** and **B**). The *RPE* values did show an ordering, percent  
237 significance increased as predictor and BOLD parameters approached each other. Except for 0.1, *value*  
238 showed essentially no such ranking (Figure 4**A** and **B**).

### 239 Before and after HRF

240 To separate intrinsic covariance between regressors and HRF induced correlations we measured the  
241 Pearson's correlations between 100 randomly selected predictors before and after HRF convolution. In the  
242 left column of **A** and **B** in Figure 5 are distribution estimates for raw reward and reinforcement predictors.  
243 In the right column are those same predictors after HRF convolution. Following convolution, overlap  
244 between distributions increases substantially, while the unique character of the distributions is abolished.  
245 For example, compare the bimodal shape *RPE* before convolution to its shape after (Figure 5**A** and **B**).  
246 Nor are experiment-level trends in the time courses preserved. Experiments using guess behavior were as  
247 non-specific as learning behavior (compare Figure 5**A** and **B**).

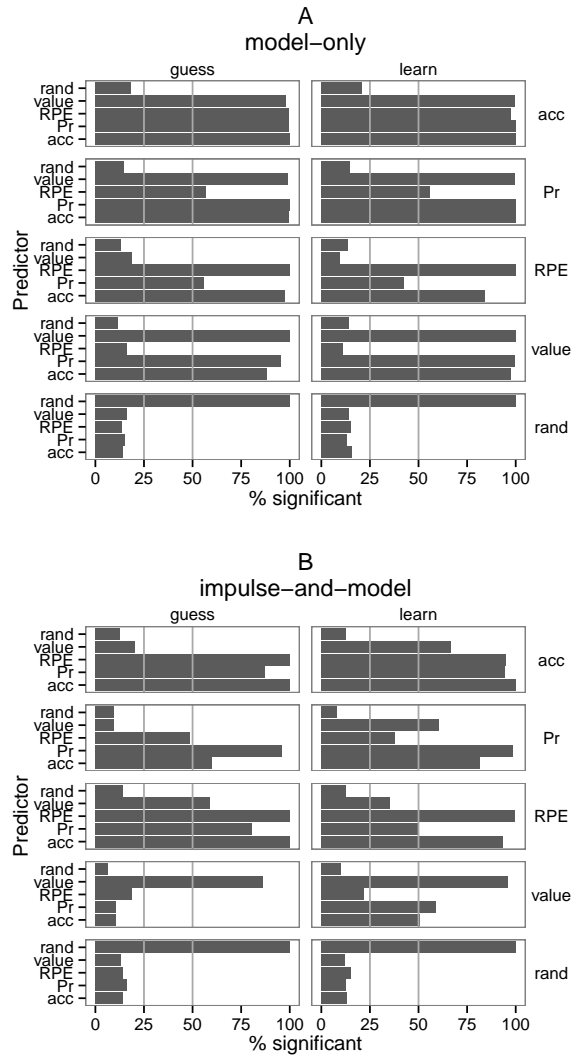

**Figure 3.** Percent of *confusion* analyses that were significant at the 0.05 level in Figure 2. The two grey lines at 25 and 50% demarcate the cutoffs used to define non-specific (25%) and indistinguishable (50%) results.



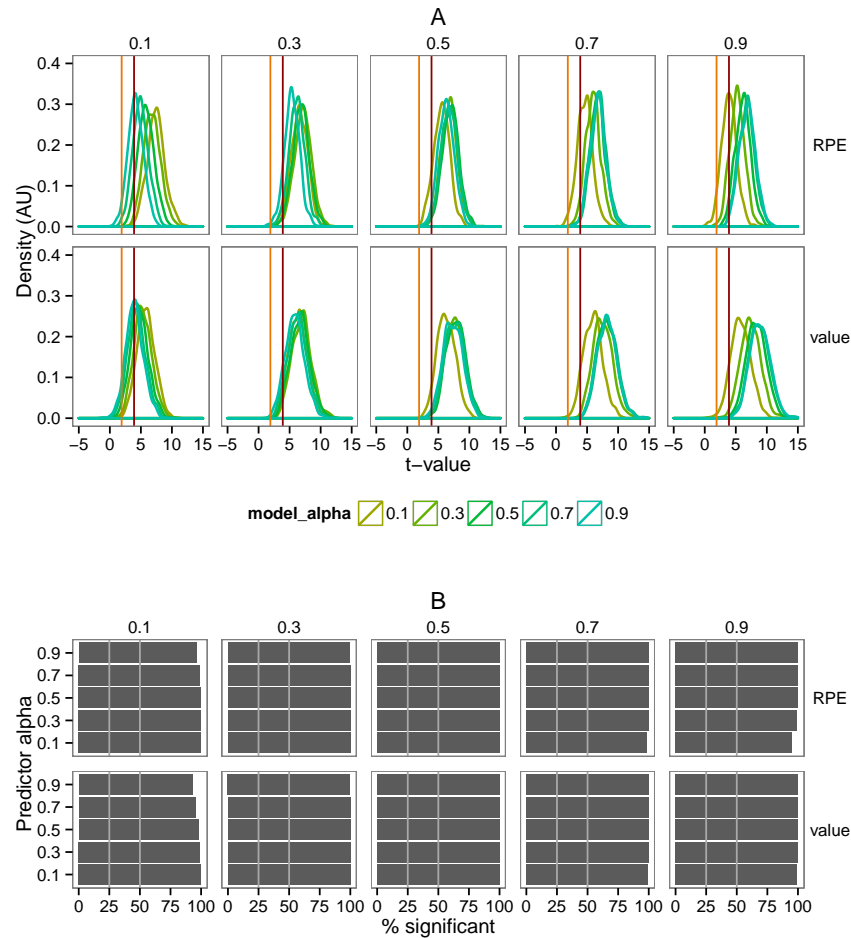

**Figure 4.** Distribution of  $t$ -values for both *RPE* and *value* as a function BOLD signals defined using a range of learning rates (see column labels). As in the *confusion* analyses, every alpha value was used in turn to form the underlying BOLD signal, in round-robin fashion. The red and orange vertical lines represent two common statistical cutoffs,  $p < 0.0001$  and  $p < 0.05$  respectively. **B** Percent of tests from **A** that were significant at 0.05 for each alpha value. The two grey lines at 25 and 50% demarcate the cutoffs we used to define non-specific (25%) and indistinguishable (50%) results. Only guess behavioral models and model-only designs were employed in this analysis.

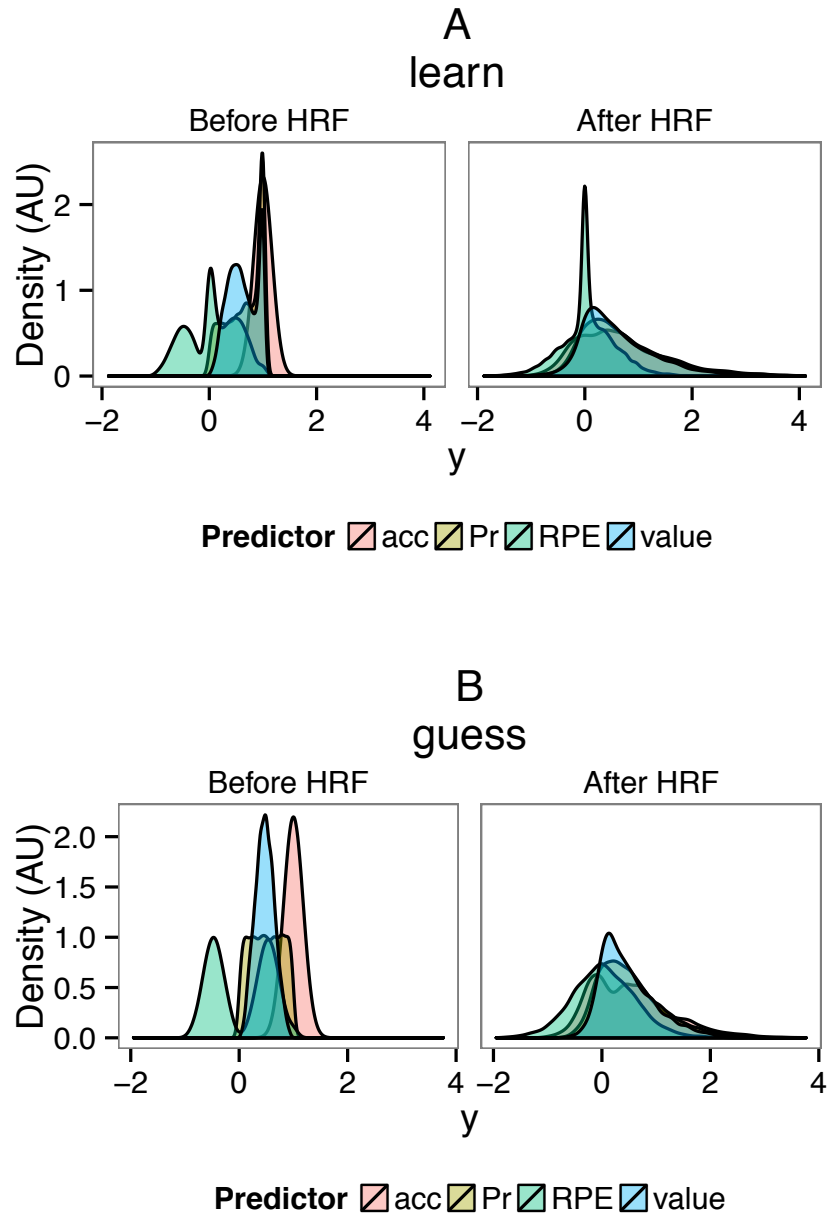

**Figure 5.** The distribution of 100 randomly selected reinforcement learning time courses, before and after HRF convolution. These are raw data, not distributions of  $t$  values as in the above figures. The four predictors were *accuracy* (red),  $P_r$  (yellow), *RPE* (green), and *value* (blue).

248 The HRF increased correlations in the majority of pairs, covering a range -0.16 to 0.73 with an average  
249 of 0.27 (see Fig 7) The HRF increased correlations among all predictor pairs up until their pre-HRF  
250 correlation approached 0.5, after which the correlation began to decline slightly (Fig 6 and Fig 7). When  
251 the correlations were broken down into quartiles (Fig 6B), each set of lines had similar slopes (excepting  
252 the transition near 0.5) which suggests the HRF has a consistent effect independent of predictor pair.  
253 Linear regression analyses supported this conclusion, indicating that  $r_{before}$  could significantly predict  
254  $r_{diff}$ , the difference in correlation before and after, ( $F(1, 498) = 713.4, p < 2.2e - 16$ ) accounting for  
255 0.58 % of the variance. However by including a 'pair' dummy predictor (facet labels in Fig 6A), a  
256 combined pair- $r_{before}$  model could account for 0.9207 of the variance ( $F(5, 494) = 1160, p < 2.2e - 16$ )  
257 and was a significant improvement over the model using only  $r_{before}$  ( $F(2, 494) = 523.5, p < 2.2e - 16$ ).  
258 In total then, the initial correlation between predictors does play a significant role in predicting the change  
259 induced by the HRF, however there is a pair (and therefore model) specific component as well (estimated  
260 here to be 38% of the total explained variance). A similar analyses of the *separation* analyses data showed  
261 a nearly identical pattern (not shown). Follow up analyses of the pair-specific contribution was without  
262 significant result.

## 263 DISCUSSION

264 Using reinforcement learning models as a case study we examined the specificity of model-based fMRI.  
265 In the first analysis, dubbed *confusion*, we examined how reliably we could distinguish between related  
266 but theoretically distinct predictors. About half the time, the different predictors were indistinguishable  
267 (see Figure 2A and Figure 3A). In the second analysis, dubbed *separation*, we determined that nearly all  
268 reinforcement learning model parameter settings were indistinguishable (Figure 4).

### 269 Minimum specificity

270 In both model-only and model and impulse design matrices 15-20% of guessing behavioral trials were  
271 significant (Figure 3A and B; percents calculated using the  $p < 0.05$  threshold). Predictor type had little  
272 to no effect on this rate (compare y-axis of row 'rand', Figure 3). As the *random* predictor contains  
273 no consistent trial-level information we would expect essentially no correlation, and in fact the average  
274 correlation between *random* and the other time courses was less than 0.04. Based on this, we conclude  
275 that HRF convolution reduces specificity by a minimum of 15%. It should be noted however that 15% is a  
276 minimum estimate. By acting as a low-pass filter the HRF may amplify any trial-level covariance (see  
277 Figures 6 and 7 for examples and caveats).

### 278 The impact of the design matrix

279 Randomization, slow-event related designs, and inter-trial jitter are routinely employed in impulse-based  
280 designs to ameliorate correlated regressor issues. The continuous valued and the generative process-  
281 derived nature of model-based data limits randomization options. The correlation analysis in Fig 6  
282 suggest that the limited specificity we report is not due to undersampling, or detection power, but is an  
283 intrinsic property of HRF convolution implying slow-event related designs would offer little improvement.  
284 Likewise, inter-trial jitter works by randomly separating out conditions, allowing for the independent  
285 estimation of each condition's response. However the continuous nature of model-based predictors doesn't  
286 fit well into a condition oriented analysis.

### 287 Alternatives to OLS

288 In these simulations it was often the case that the true model was significant more often than the  
289 alternatives, even though all were frequently significant (Figure 2). As a result, a model selection or  
290 comparison approach to model-based fMRI should be fruitful. Model selection is the process of finding a  
291 *family* of models that best predict a given dataset (Rao et al., 2001). This can be as simple as comparing the  
292 explained variance (i.e.  $R^2$ ) between model options. More sophisticated techniques though will attempt  
293 to balance parsimony with increasing fit (i.e., solving the bias versus variance dilemma (Geman et al.,  
294 1992)). Examples include Stepwise, LASSO, or Ridge (Tikhonov) regression. Ridge regression is of  
295 particular interest as it is capable of selecting among covariate or collinear predictors, as was the case for  
296 our reinforcement and reward-related predictors. As an alternative to algorithmic selection procedures,  
297 and the sometimes stronger assumptions they entail, candidate models could be directly compared using  
298 standard model comparison metrics, such as Akaike Information Criterion (AIC) weights (Wagenmakers

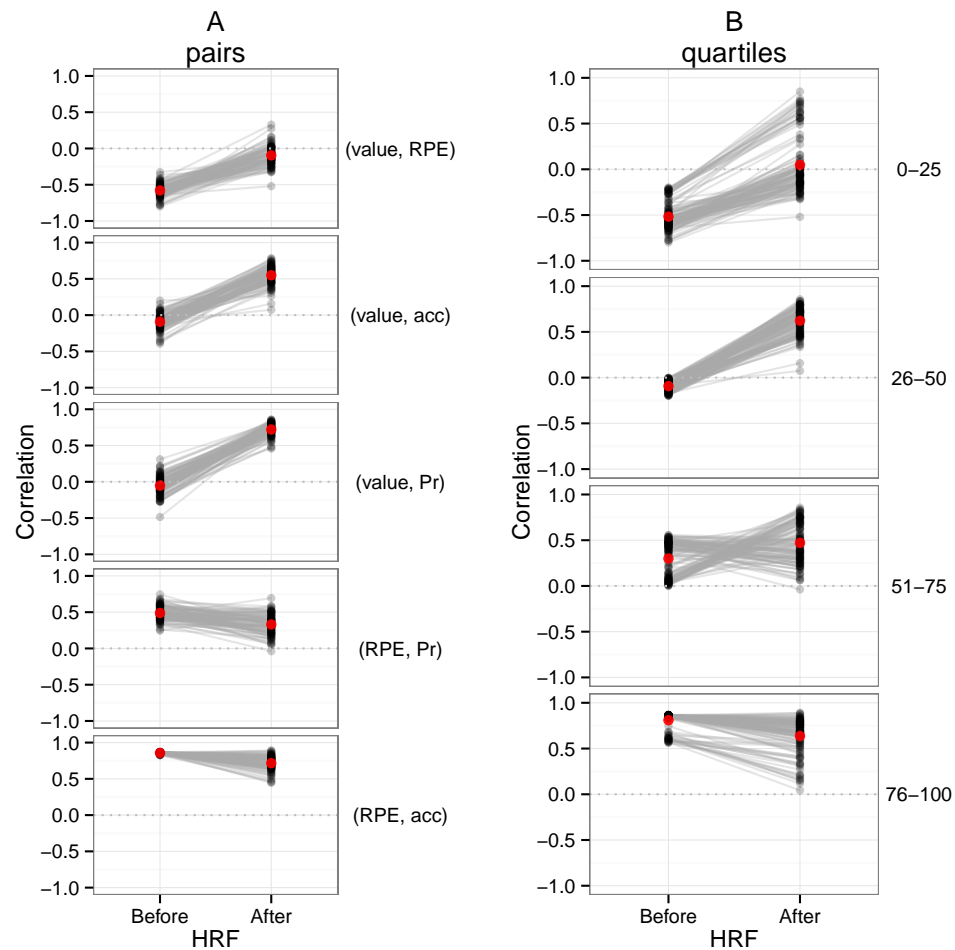

**Figure 6. A.** Correlations between each unique pair of predictors (labels in parenthesis) for 100 randomly selected simulations. **B.** The same pairs now binned by quartiles derived from the before HRF convolution set (column labels indicate quartile). The red dot represents the average for that condition.

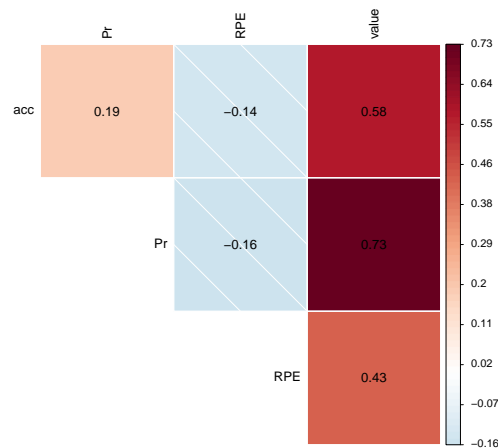

**Figure 7.** Average difference of predictor correlation matrices before and after HRF convolution, a quantification of overall effect of HRF convolution.

299 and Farrell, 2004). In doing to model comparisons however, it is crucial that one selects suitable and  
300 viable alternate models, specifically avoiding “stacking the deck” in favor of a preferred option.

### 301 **Problems for parameters**

302 Given that reinforcement learning parameters are typically set based on behavioral data, one might first  
303 assume it is not important that the GLM procedure cannot distinguish between parameters. However,  
304 further reflection suggests the lack of parameter sensitivity is important for three reasons. First, given a  
305 significant result it would normally be tempting to conclude that, “our model was a significant predictor  
306 of the BOLD changes under parameters  $\{\alpha, \beta, \theta\}$  therefore neural activity may reflects these models  
307 and parameters”. But given our results it quite possible a very different set of parameters,  $\{\alpha', \beta', \theta'\}$ ,  
308 would also be significant. Without specificity all a finding of significance can guarantee is that, “Some  
309 (unspecified) set of parameters near our parameters  $\{\alpha, \beta, \theta\}$  were significant predictors of BOLD  
310 activity”, which seems a deeply unsatisfying *best case* conclusion. Second, parameter changes can  
311 considerably alter model behavior. For example, in Figure 1D the choice of the learning rate parameter  $\alpha$   
312 affected both qualitative (compare 0.1 with 0.9) and quantitative (compare 0.1 with 0.3) behavior. Thirdly,  
313 model-based designs are often used in the clinical literature to examine neural correlate differences  
314 between patient and control populations (Castro-Rodrigues and Oliveira-Maia, 2013; Deserno et al., 2013).  
315 Without specificity, such comparisons are meaningless.

316 Consider again the *separation* data (Figure 4); it would be difficult for any method to separate the  
317 overlapped distributions observed, unless a very large number of samples were available or only extreme  
318 parameters settings are considered. If true beyond our case-study (as may be the case, see Fig 6), reliable  
319 parameter separation in model-based fMRI may prove quite difficult. Computational models are useful, in  
320 part, because they make quantitative predictions, predictions which depend on parameter settings. If you  
321 can't distinguish between parameters, you can't distinguish between quantitative predictions.

### 322 **Limitations and generalizations**

323 The kind of specificity we study here is most relevant when two or more theoretical models are compared,  
324 and when predictions depend on parameter choices. This does not mean that the specificity issues are  
325 limited to computational modeling. Any parametric design, for example one derived from reward value,  
326 reaction time, or subjective scoring, like happiness or emotional salience, may also have it's trial-level  
327 specificity diminished by convolution with the HRF. In that sense, our case study of reinforcement learning  
328 may have much broader potential implications. A reduction in specificity may happen whenever the  
329 predictor changes faster then the BOLD response, which acts akin to a low-pass filter.

330 While low-pass filtering by the HRF is always possible, specificity will matter less when when models  
331 or parametric regressors are being used as stand-ins for latent psychological states. Specificity doesn't  
332 matter in cases where parametric responses are estimated from *repeated measurements* of fixed conditions,  
333 such as the recent retinotopy-based image reconstruction work ?. That is, the specificity problem we begin to  
334 demonstrate is not present when the goal is estimate the expectation of some consistent response function,  
335 but is present when we the aim is to account for as much trial-level variability as possible. Finally, if  
336 several models were compared to the BOLD response and their response were averaged, this would  
337 implicitly lessen the importance of any one model's specificity.

## 338 **Conclusions**

339 To study the relation between significance and specificity in model-based fMRI we made a case study of  
340 reinforcement learning. Being a case study, and an idealized one at that, the generality of these results to  
341 other models and past empirical work is unproven. But what we have found urges caution. The prototyped  
342 shape and long temporal evolution of the haemodynamic response function can induce strong positive  
343 correlations between predictors. In our worst case, the HRF more than doubled the correlation between  
344 predictors, about halving specificity. We urge researchers to consider carefully the interpretation of their  
345 significant model-based results and perhaps to move from a null hypothesis testing framework to model  
346 comparison framework.

## 347 **DISCLOSURE/CONFLICT-OF-INTEREST STATEMENT**

348 The authors declare that the research was conducted in the absence of any commercial or financial  
349 relationships that could be construed as a potential conflict of interest.

## 350 **AUTHOR CONTRIBUTIONS**

351 EJP designed and conducted the study, and wrote the paper. CAS helped design the study and wrote the  
352 paper.

## 353 **ACKNOWLEDGEMENT**

354 We thank Bradley Voytek and Howard Landman for their useful feedback on an earlier version of the  
355 manuscript. This work was carried out under National Institutes of Health R01MH079182.

## 356 **REFERENCES**

- 357 Bandettini, P. (2007). Functional mri today. *Int J Psychophysiol*, 63(2):138–45.
- 358 Baumgartner, R., Somorjai, R., Summers, R., Richter, W., and Ryner, L. (2000). Correlator beware:  
359 correlation has limited selectivity for fmri data analysis. *Neuroimage*, 12(2):240–3.
- 360 Boynton, G. M., Engel, S. A., Glover, G. H., and Heeger, D. J. (1996). Linear systems analysis of  
361 functional magnetic resonance imaging in human v1. *J Neurosci*, 16(13):4207–21.
- 362 Castro-Rodrigues, P. and Oliveira-Maia, A. J. (2013). Exploring the effects of depression and treatment  
363 of depression in reinforcement learning. *Frontiers in Integrative Neuroscience*, 7:72.
- 364 D'Ardenne, K., McClure, S. M., Nystrom, L. E., and Cohen, J. D. (2008). Bold responses reflecting  
365 dopaminergic signals in the human ventral tegmental area. *Science*, 319(5867):1264–7.
- 366 Delgado, M. R., Locke, H. M., Stenger, V. A., and Fiez, J. A. (2003). Dorsal striatum responses to reward  
367 and punishment: effects of valence and magnitude manipulations. *Cognitive, affective & behavioral  
368 neuroscience*, 3(1):27–38.
- 369 Delgado, M. R., Nystrom, L. E., Fissell, C., Noll, D. C., and Fiez, J. A. (2000). Tracking the hemodynamic  
370 responses to reward and punishment in the striatum. *J Physiol.*, 84(6):3072–7.
- 371 Delgado, M. R., Stenger, V. A., and Fiez, J. A. (2004). Motivation-dependent responses in the human  
372 caudate nucleus. *Cereb Cortex*, 14(9):1022–30.
- 373 Deserno, L., Boehme, R., Heinz, A., and Schlagenhaut, F. (2013). Reinforcement learning and dopamine  
374 in schizophrenia: dimensions of symptoms or specific features of a disease group? *Frontiers in  
375 Psychiatry*, 4(172).
- 376 Frank, M. J., Moustafa, A. A., Haughey, H. M., Curran, T., and Hutchison, K. E. (2007). Genetic triple  
377 dissociation reveals multiple roles for dopamine in reinforcement learning. *PNAS*, 104(41):16311–6.

- 378 Frank, M. J. and O'Reilly, R. C. (2006). A mechanistic account of striatal dopamine function in  
379 human cognition: psychopharmacological studies with cabergoline and haloperidol. *Behav. Neurosci.*  
380 120(3):497–517.
- 381 Friston, K. J., Josephs, O., Rees, G., and Turner, R. (1998). Nonlinear event-related responses in fmri.  
382 *Magnetic resonance in medicine : official journal of the Society of Magnetic Resonance in Medicine /*  
383 *Society of Magnetic Resonance in Medicine*, 39(1):41–52.
- 384 Fujiwara, J., Tobler, P., Taira, M., Iijima, T., and Tsutsui, K. (2008). A parametric relief signal in human  
385 ventrolateral prefrontal cortex. *Neuroimage*.
- 386 Garrison, J., Erdeniz, B., and Done, J. (2013). Prediction error in reinforcement learning: A meta-analysis  
387 of neuroimaging studies. *Neuroscience & Biobehavioral Reviews*, 37(7):1297 – 1310.
- 388 Geman, S., Bienenstock, E., and Doursat, R. (1992). Neural networks and the bias/variance dilemma.  
389 *Neural Computation*, 4(1):1–58.
- 390 Glimcher, P. W. (2011). Understanding dopamine and reinforcement learning: the dopamine reward  
391 prediction error hypothesis. *Proceedings of the National Academy of Sciences*, 108 Suppl 3:15647–54.
- 392 Henson, R., Rugg, M., and Friston, K. (2001). The choice of basis functions in event-related fmri.  
393 *Neuroimage*, 13(Suppl 1):127.
- 394 Hollerman, J. R., Tremblay, L., and Schultz, W. (1998). Influence of reward expectation on behavior-  
395 related neuronal activity in primate striatum. *J Physiol.*, 80(2):947–63.
- 396 Josephs, O., Turner, R., and Friston, K. (1997). Event-related f mri. *Hum Brain Mapp*, 5(4):243–8.
- 397 Lopez-Paniagua, D. and Seger, C. A. (2011). Interactions within and between corticostriatal loops during  
398 component processes of category learning. *Journal of cognitive neuroscience*, 23(10):3068–3083.
- 399 Mars, R. B., Shea, N. J., Kolling, N., and Rushworth, M. F. S. (2010). Model-based analyses: Promises,  
400 pitfalls, and example applications to the study of cognitive control. *Q J Exp Psychol (Colchester)*,  
401 pages 1–16.
- 402 McClure, S. M., Berns, G. S., and Montague, P. R. (2003). Temporal prediction errors in a passive  
403 learning task activate human striatum. *Neuron*, 38(2):339–46.
- 404 Mirenowicz, J. and Schultz, W. (1994). Importance of unpredictability for reward responses in primate  
405 dopamine neurons. *J Physiol.*, 72(2):1024.
- 406 Montague, P., King-Casas, B., and Cohen, J. (2006). Imaging valuation models in human choice. *Annu*  
407 *Rev Neurosci*, 29:417–448.
- 408 O'Doherty, J. P., Hampton, A. N., and Kim, H. (2007). Model-based fmri and its application to reward  
409 learning and decision making. *Annals of the New York Academy of Sciences*, 1104:35–53.
- 410 Penny, W., Friston, K., Ashburner, J., Kiebel, S., and Nichols, T. (2006). *Statistical Parametric Mapping:*  
411 *The Analysis of Functional Brain*. Elsevier, 4 edition.
- 412 Pessiglione, M., Seymour, B., Flandin, G., Dolan, R. J., and Frith, C. D. (2006). Dopamine dependent  
413 prediction error underpin reward-seeking behaviour in humans. *Nature Neuroscience*, 442(31):1042–  
414 1045.
- 415 Pizzagalli, D. A., Evins, A. E., Schetter, E. C., Frank, M. J., Pajtas, P. E., Santesso, D. L., and Culhane,  
416 M. (2008). Single dose of a dopamine agonist impairs reinforcement learning in humans: Behavioral  
417 evidence from a laboratory-based measure of reward responsiveness. *Psychopharmacology (Berl)*,  
418 196(2):221–232.
- 419 Rao, C. R., Wu, Y., Konishi, S., and Mukerjee, R. (2001). On model selection. *Lecture Notes-Monograph*  
420 *Series, Model Selection*, 38:1–64.
- 421 Roesch, M. R., Calu, D. J., and Schoenbaum, G. (2007). Dopamine neurons encode the better option in  
422 rats deciding between differently delayed or sized rewards. *Nat Neurosci*, 10(12):1615–24.
- 423 Seger, C. A. and Cincotta, C. (2005). The roles of the caudate nucleus in human classification learning. *J*  
424 *Neurosci*, 25(11):2941–2951.
- 425 Seger, C. A., Peterson, E. J., Cincotta, C. M., Lopez-Paniagua, D., and Anderson, C. W. (2010). Dissociat-  
426 ing the contributions of independent corticostriatal systems to visual categorization learning through the  
427 use of reinforcement learning modeling and granger causality modeling. *Neuroimage*, 50(2):644–56.
- 428 Sutton, R. S. and Barto, A. G. (1998). Reinforcement learning: An introduction. *MIT Press*.
- 429 Wagenmakers, E.-J. and Farrell, S. (2004). Aic model selection using akaike weights. *Psychon Bull Rev*,  
430 11(1):192–6.
- 431 Wais, P. E. (2008). Fmri signals associated with memory strength in the medial temporal lobes: a  
432 meta-analysis. *Neuropsychologia*, 46(14):3185–96.
